# Supplementary material for: New horizons in pulmonary arterial hypertension therapies
Source: PubMed Central journal article supplement — Eur Respir Rev. 2013 Dec;22(130):503–14. doi: 10.1183/09059180.00006613 (PMC9639192; doi:10.1183/09059180.00006613), 2013-12
Supplement: ERR_0066-2013_Disclosures.pdf [file ERR_0066-2013_Disclosures.pdf]

**N. Galiè** has acted as a consultant for Actelion Pharmaceuticals Ltd, Bayer HealthCare, Eli Lilly & Co, GlaxoSmithKline and Pfizer and has received research funding from Actelion Pharmaceuticals Ltd, Bayer HealthCare, Eli Lilly & Co, GlaxoSmithKline and Pfizer.

**A-H. Ghofrani** has acted as a consultant for Actelion Pharmaceuticals Ltd, Gilead, GlaxoSmithKline, Merck, Novartis, Pfizer, Bayer HealthCare and Ergonex and has received honoraria, research support, travel support and fees for participating in monitoring boards, statistical analyses and endpoint committees from Actelion Pharmaceuticals Ltd.
